# Supplementary material for: Let-7a-5p Regulates Animal Lipid Accumulation by Targeting Srebf2 and Thbs1 Signaling
Source: MDPI journal article supplement (doi:10.3390/ijms25020894), 2024-01-11
Supplement: s1 [file s1]

Table S1: Summary and quality assessment of the mRNA sequencing data; Table S2: The list of all DE genes between the HFD and SND groups; Table S3: The KEGG analysis of DE genes; Table S4: The GO analysis of DE genes; Table S5: The sequence information of RNA oligo and siRNA; Table S6: The sequence information of primer used for the qRT-PCR analysis; Table S7: The target genes of let-7a-5p predicted by using the Starbase database; Table S8: KEGG analysis of let-5a-5p target genes; Table S9: GO analysis of let-7a-5p target genes.
